# Supplementary material for: CH 4 exchange at the forest floor of a forestry-drained fen: low flux rates but high temporal variation
Source: Copernicus journal article supplement (doi:10.5194/bg-2016-239), 2016-07-26
Supplement: Supplementary file [file bg-2016-239-RC2-supplement.pdf]

The manuscript is based on the continuous two years CH<sub>4</sub> flux dataset obtained by automatic chamber measurement at a forestry-drained fen. The use of high-resolution gas analyzer let the authors to document low and variable fluxes, and continuity of the measurements together with their high temporal resolution allowed to estimate longtime net CH<sub>4</sub> exchange and judge the variability of the fluxes. The site chosen for the study is not an easy one for CH<sub>4</sub> flux measurements: the net result of both methanogenic and methanotrophic activities can change from small negative to small positive flux, being dependent on a combination of different factors. I highly appreciate the value of the obtained dataset, and would really like to see this study eventually published.

Unfortunately, within a number of comments following below, at least one seems to be critical and enforces me to ask for a major revision (followed by an additional review):

Equation 5 (page 6) seems to be incorrect, or, at least, has been presented incorrectly. If the time derivative is expressed in ppm/h, and the resulting flux  $F$  is also per hour, why the multiplier 3600 s/h is used? Then, I do not see a reason for a multiplier 273.15 in the numerator of the temperature fraction: the universal gas law with constant  $R$  in J mol<sup>-1</sup> K<sup>-1</sup> in the denominator implies temperature in K (273.15 +  $T$  in C) also in the denominator. Another way of expression for this type of flux equations (for example, Koskinen et al., 2014) operates with the standard molar volume of ideal gas instead of the universal gas constant ( $R$ ), in this case ratios between the standard and the actual temperature and pressure are used. The equation 5 as it is stated in the manuscript is a mixture of these two correct approaches, and is mathematically incorrect. Formally, in the result of these two mistakes, the  $F$  values obtained with Eq.5 must be overestimated by six orders of magnitude. However, the reported fluxes seem to be of a realistic order of magnitude, while million times lower fluxes are absolutely undetectable by this type of measurements. Thus, I suppose the authors did not use the Eq.5 as it stated in the manuscript, but I can not exclude a chance that the actually used formula was also somewhat incorrect.

Talking about flux calculations, I would also ask the authors to describe what software and how was used; I can not imagine such amount of data was processed without some automated scripts/programs. Then, the description of these scripts/programs and their settings might be crucial to evaluate possible weaknesses of the calculations. How, for example, the moment of the chamber closure ( $t=0$ , page 5 line 25) was recognized by this program? As I understand from Koskinen et al. (2014), the chambers were controlled from a separate Linux PC, so operated according to its internal clock; the Picarro analyzer recorded the measured concentrations with the time stamp from its own clock – had those two being synchronized, and how often? Was the delay in gas lines between the chamber and the analyzer properly addressed?

More about the setup: was it the same as described by Koskinen et al. (2014), just with the Picarro analyzer connected in parallel to the Licor CO<sub>2</sub> analyzer? In the current manuscript it is stated (page 4 line 25): “The polycarbonate chamber was attached to a stainless steel frame (see description in Koskinen et al., 2014).” – not clear for the reader, is the reference about the frame, or the whole chamber, or the whole setup. Then some setup features are described, almost exactly in the same words as in the 2014 publication, but others (like valves, fan, etc.) are skipped. As the result, the description looks somewhat sleazy: for example (page 4 line 20), “A gas inlet tube

made of polyurethane (FESTO, OD = 6 mm, ID = 4 mm)” – but wasn’t the outlet tube made of the same material and size? I would strongly suggest the authors to completely rethink section 2.2 – clearly state in the beginning, that the setup was described in details by Koskinen et al. (2014), repeat only key elements of that description without details, then clearly state what in the described measurement system is different from 2014 publication (here with all the details).

My next group of comments is related to the fact that the majority of the fluxes reported in the current study have a really low value (Fig.3). According to my back-of-the-envelope calculations, a net uptake of  $20 \mu\text{g CH}_4 \text{ m}^{-2} \text{ h}^{-1}$  equals to  $\text{CH}_4$  concentration change in the chamber of about 3 ppb over 2 minutes! Being amazed by the quality of the study, which made possible to justify such small fluxes, I have to stress the authors about the extra precaution with such data processing, interpretation and discussion.

For example, was the effect of water vapor dilution properly addressed? In  $\text{CO}_2$  study (Koskinen et al., 2014) it was stated “The  $\text{CO}_2$  concentration values were not corrected for water vapor dilution as the change in air humidity during measurement was small (data not shown)”. In the current study, when  $\text{CH}_4$  concentration in the chamber changes so tiny ( $3/1850=0.16\%$ ), even a small change of humidity inside the chamber during the measurement can strongly influence the result. Was  $\text{H}_2\text{O}$  concentration in the gas sample measured by the same Picarro G1130 analyzer (page 4, line 24 – unfortunately, I was unable to find any information about this model in the Internet)? Was the wet or the dry mixing ratio used in the calculations? I think the water vapor dilution should be both addressed in the calculations, and discussed in the manuscript.

In opposite, with such small change in the chamber headspace  $\text{CH}_4$  concentration, I think the discussion about “distortion of the vertical concentration gradient” between the soil and the headspace (mentioned many times throughout the whole manuscript) and the concentration feedback on the microbial oxidation rate (page 11 line 29) is virtually not applicable to the current study. Undoubtedly, both can be discussed, but with a clear note, that the change in the headspace concentration from 1850 to 1847 ppb  $\text{CH}_4$  should practically not affect either gradient or methanotrophic activity.

In this context, I do not agree with the reasoning (for example, page 11 line 20) that the distortion of the vertical concentration gradient is the main reason for non-linearity of the concentration change in the closed chamber and the difference between the linear and exponential flux estimations. In my opinion much more important reasons are water vapor dilution (see above) and leakages (both through chamber construction and through the soil). The possible leakages are not discussed at all in the manuscript; even the fact that “when the wind speed increased, the uptake of  $\text{CH}_4$  decreased” (page 15 line 8) does not seem suspicious for the authors. However, such fact often can be very clearly explained by small leaks in the chamber – see for example Pirk et al., 2016 (doi:10.5194/bg-13-903-2016), where the non-linearity of detected fluxes is directly related to the wind speed and the material of chamber sealing.

Another point I do not agree with, is an intransigent statement that “use of linear regression systematically underestimated  $\text{CH}_4$  flux rates” (page 1 line 14, and many times later in the manuscripts). Such statement implies that one knows the “true” flux values, and compares them to the ones obtained by a linear regression. This is not the case in the current study (but is the

case for example in Pihlatie et al., 2013, where the flux was pre-set). Instead, the fluxes were estimated with two different mathematical methods (linear and exponential), and the results were somewhat different (Fig.2). Then the authors propose, that the linear estimation is more correct for low fluxes, and exponential – for high fluxes. This should be phrased as a proposal, as an assumption, supported by theoretical arguments and other studies, but still not as a statement, proven by this study.

Still having in mind very low magnitude of the fluxes, I would ask the authors to add, either in the main paper or in the supplementary material, a figure with two typical examples of concentration data during flux measurements – one with a high flux (over  $3.5 \mu\text{g CH}_4 \text{ m}^{-2} \text{ h}^{-1}$ ), and one with a low flux – with lines for the linear and the exponential approximation over each. That will be a very sensible for the reader illustration of the measurement precision, signal-to-noise ratios, etc.

And the last general comment. Unfortunately, I have to mention somewhat careless formulations and citations in the introduction:

Page 2 line 10: “In peatlands, the net  $\text{CH}_4$  flux between the soil and atmosphere is the sum of  $\text{CH}_4$  production and oxidation (Dunfield et al., 1993)” – the word “sum” is never used in this publication; it was a great detailed study of both processes, but the authors never stated that they sum up to the flux. There are more processes – lateral transport (applicable to the current study with drainage ditches), subsurface storage – which affect the net fluxes as well.

Page 2 line 20: “...a lack of electron acceptors other than acetate and hydrogen are a precondition for the production of  $\text{CH}_4$  (Segers, 1998; Kotsyurbenko et al., 2004).” Acetate and hydrogen are not electron acceptors! Hydrogen is the donor (in reaction with  $\text{CO}_2$ ), acetate decays formally without donor-acceptor interaction. The publication by Segers is mentioning “alternative electron acceptors” a lot, but never stated that acetate and hydrogen are electron acceptors; the publication by Kotsyurbenko et al. does not contain the words “electron” or “acceptor” in any form.

Page 2, lines 22-23: “The rate is mainly controlled by oxygen concentration, temperature and soil moisture (Boeckx and Van Cleemput, 1996).” The study by Boeckx and Van Cleemput was focused on experimental evaluation of three factors affecting methane oxidation: soil moisture, soil temperature and nitrogen ( $\text{NH}_4^+$ ,  $\text{NO}_3^-$ ) addition. Neither oxygen concentration nor  $\text{CH}_4$  concentration were examined (were set the same in all samples); their importance for the methanotrophic oxidation was supposed to be obvious because they are reagents. Boeckx and Van Cleemput have never stated which factors are “main”, but mentioned soil compaction and pH as well. So this citation is also incorrect and misleading: oxygen concentration, as well as methane concentration (as stated at page 11 line 29) and methanotrophic potential (amount and oxidation capacity of bacteria) are the factors, directly influencing  $\text{CH}_4$  oxidation; temperature, moisture etc. are the factors of indirect action.

Page 2, line 25: “Closed chambers are commonly used in the measurement of greenhouse gas exchange between the forest floor and the atmosphere (e.g. Livingston and Hutchinson, 1995; Christensen et al., 1995; van Huissteden et al., 2005; Alm et al., 2007; Denmead, 2008; Forbrich et al., 2009, Koskinen et al., 2014).” The publication by Livingston and Hutchinson has only one

mentioning of a forest floor (an example of study in Brazilian rain forest), but does not say how common such studies are; the publications by Christensen et al. and by van Huissteden et al. are focused on tundra and never mention “forest”.

I do not clearly remember all the publications cited in the current manuscript, and do not have enough time to check every reference. The four examples above warn me that the authors are not careful enough in their citations, so I really suggest them to check meticulously every citation in the manuscript: did the publication really state or show that? It is a big work, indeed, but it had to be done much earlier in the manuscript preparation stage.

At this stage I will not go for more specific comments and technical corrections related to the current manuscript text, as I imagine the text will be strongly changed before the resubmission. Still wish the authors to continue their work and bring their study to publication in a more carefully written form.
